# Supplementary material for: Synthesis, Characterization, Antimicrobial Activity, and Genotoxicity Assessment of Two Heterocyclic Compounds Containing 1,2,3-Selena- or 1,2,3-Thiadiazole Rings
Source: MDPI journal article supplement (doi:10.3390/molecules24224082), 2019-11-12
Supplement: s1 [file s1]

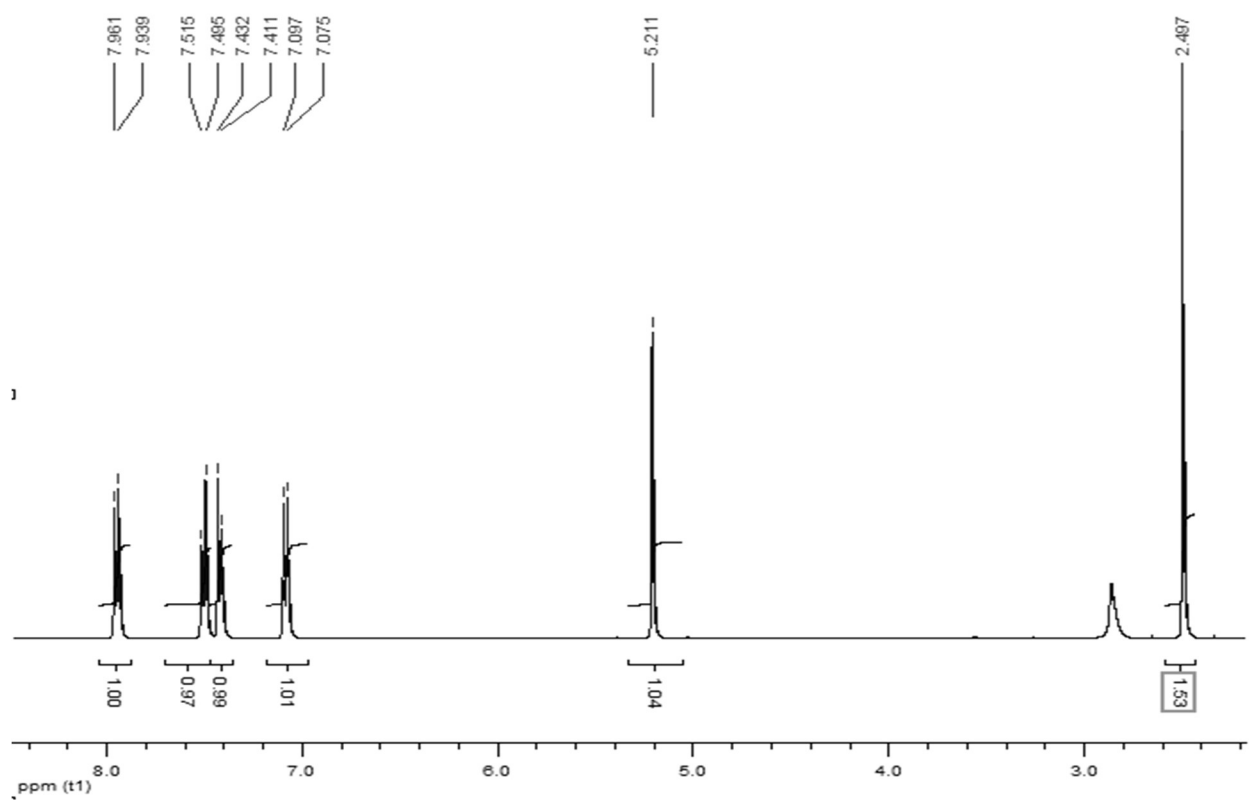

**Supplementary figure 1:** <sup>1</sup>H-NMR-spectrum Of compound **3a** in acetone-d<sub>6</sub>

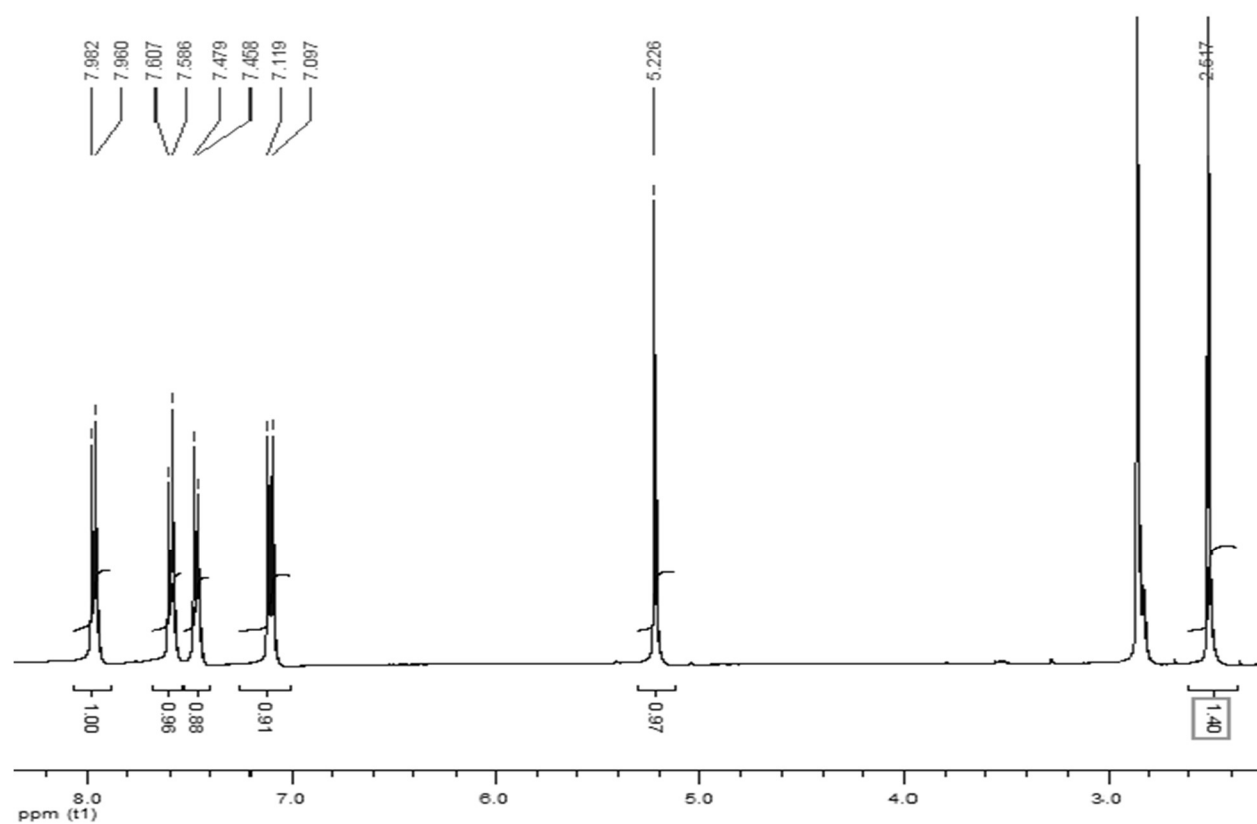

**Supplementary figure 2:** <sup>1</sup>H-NMR-spectrum Of compound **3b** in acetone-d<sub>6</sub>

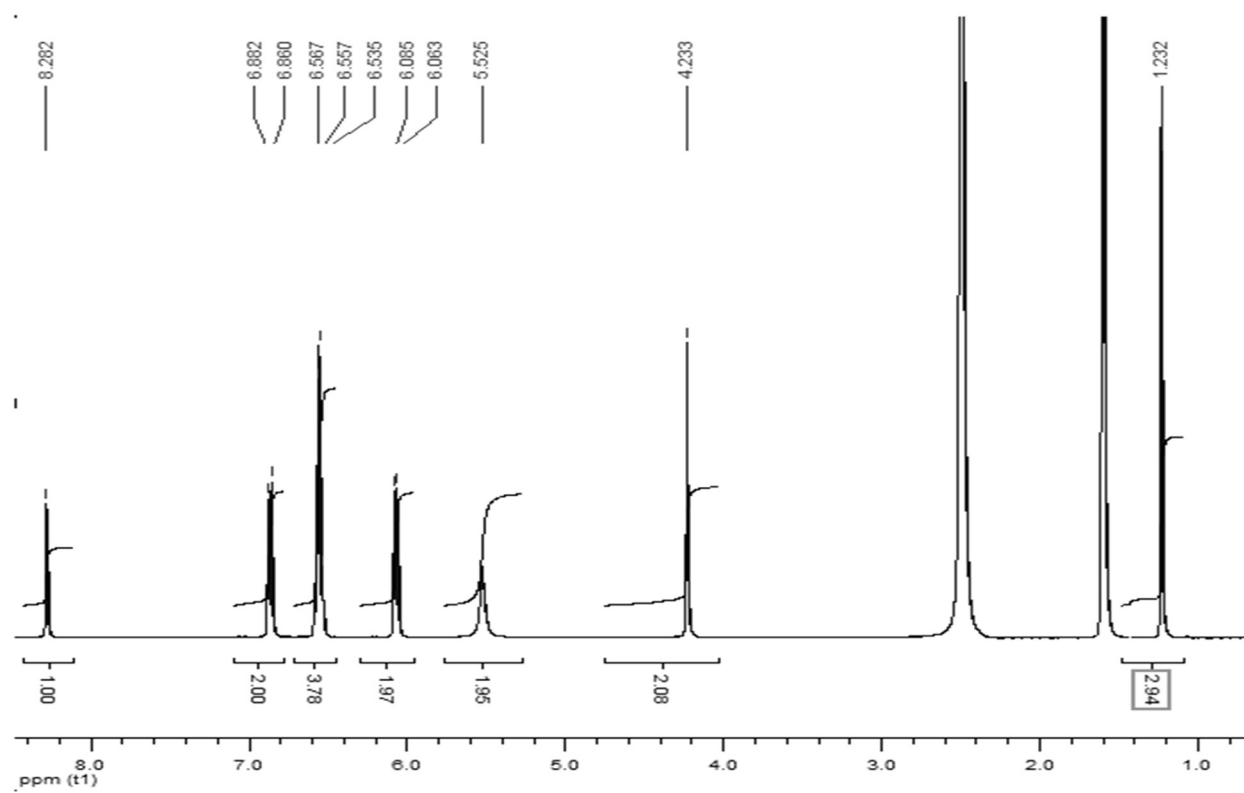

**Supplementary figure 3:** <sup>1</sup>H-NMR-spectrum Of compound **4a** in DMSO-d<sub>6</sub>

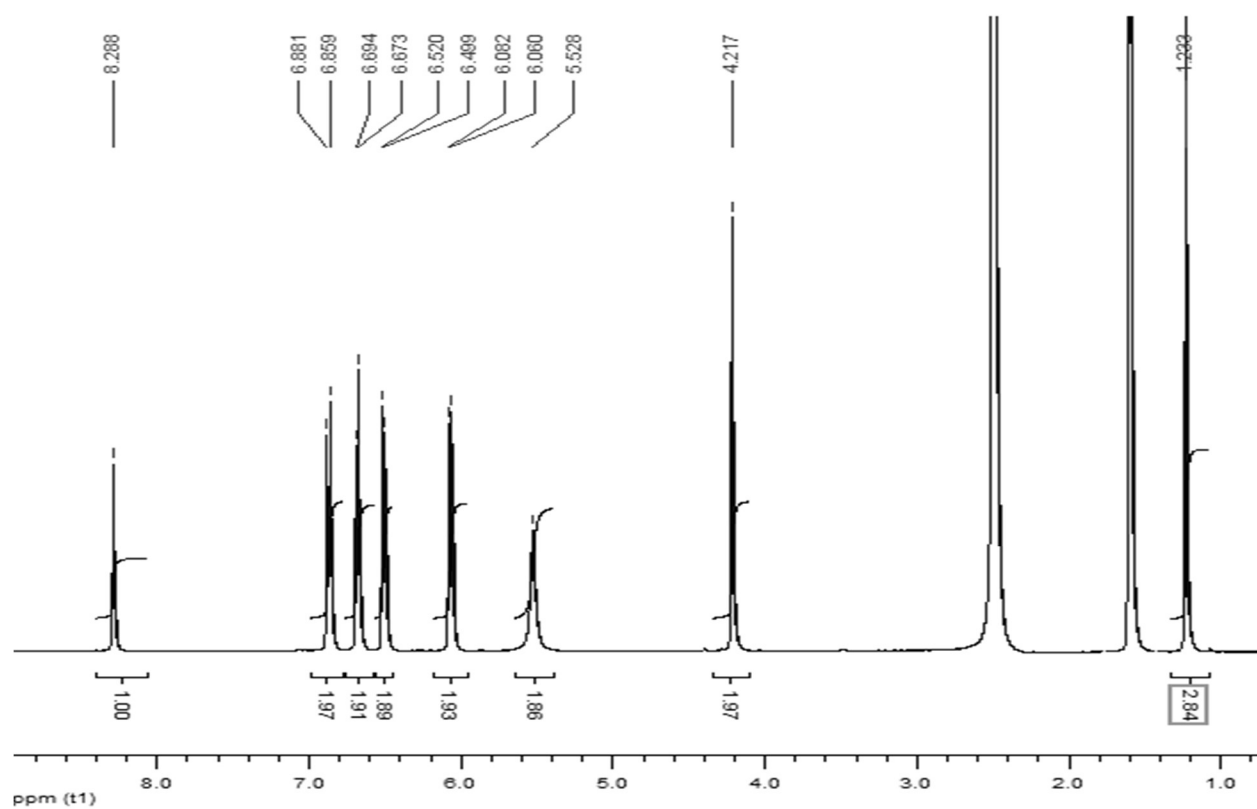

**Supplementary figure 4::** <sup>1</sup>H-NMR-spectrum Of compound **4b** in DMSO-d<sub>6</sub>

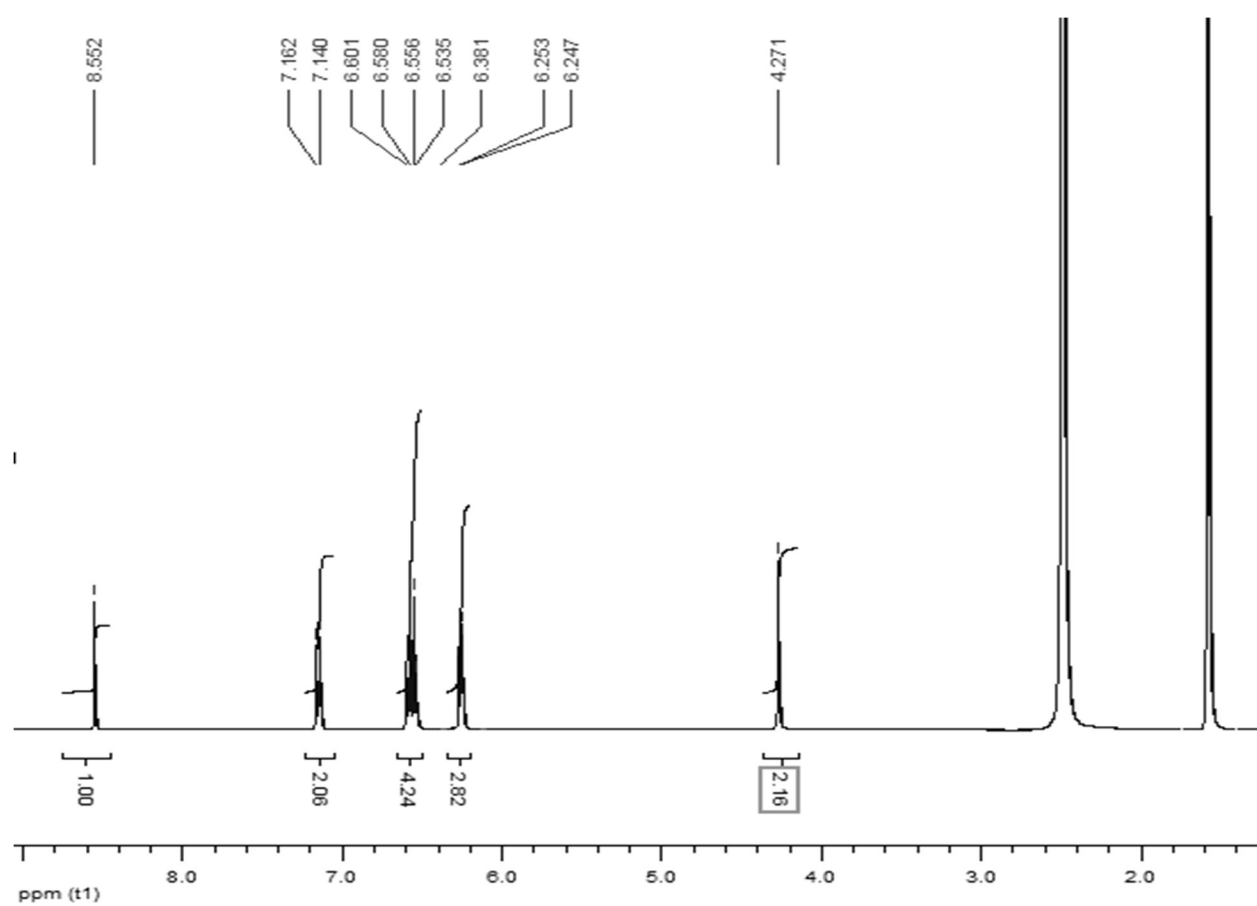

**Supplementary figure 5:** <sup>1</sup>H-NMR-spectrum Of compound **5a** in DMSO-d<sub>6</sub>

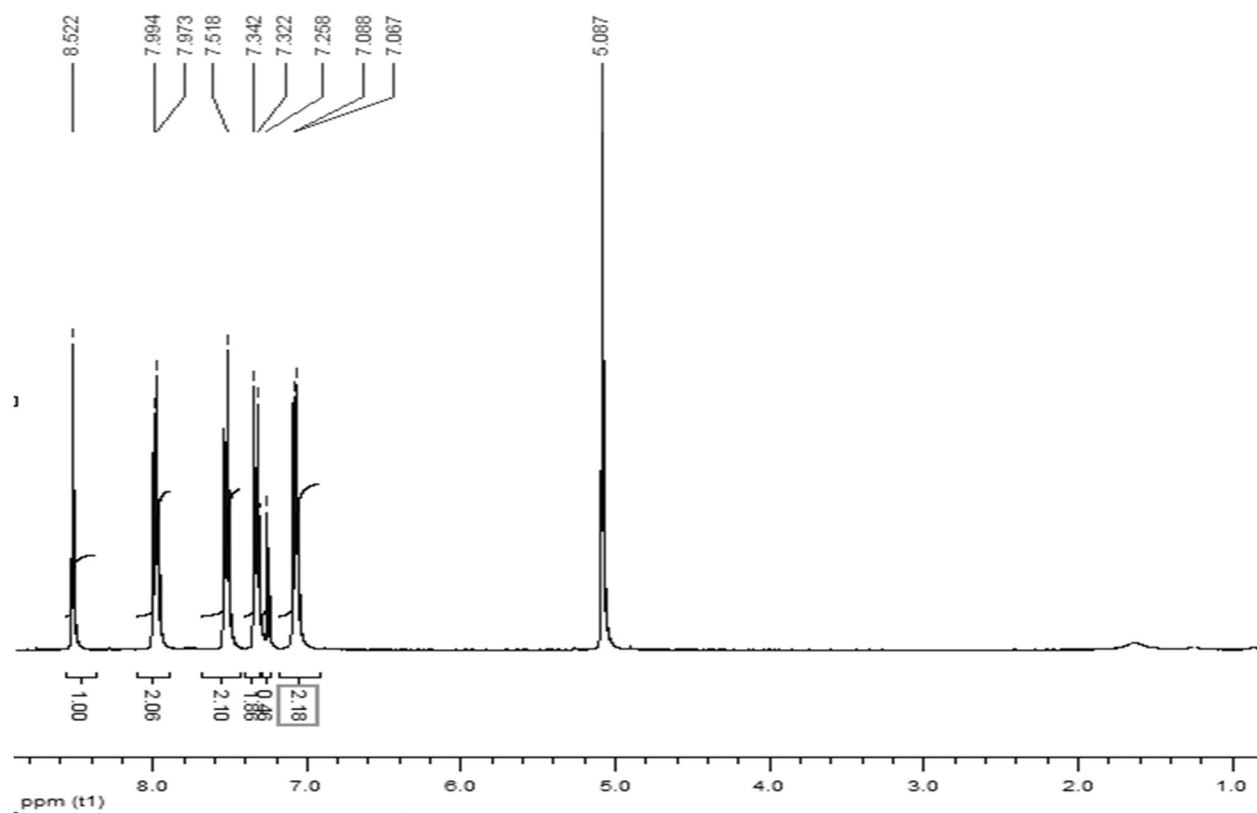

**Supplementary figure 6:** <sup>1</sup>H-NMR-spectrum of compound **5b** in CDCl<sub>3</sub>

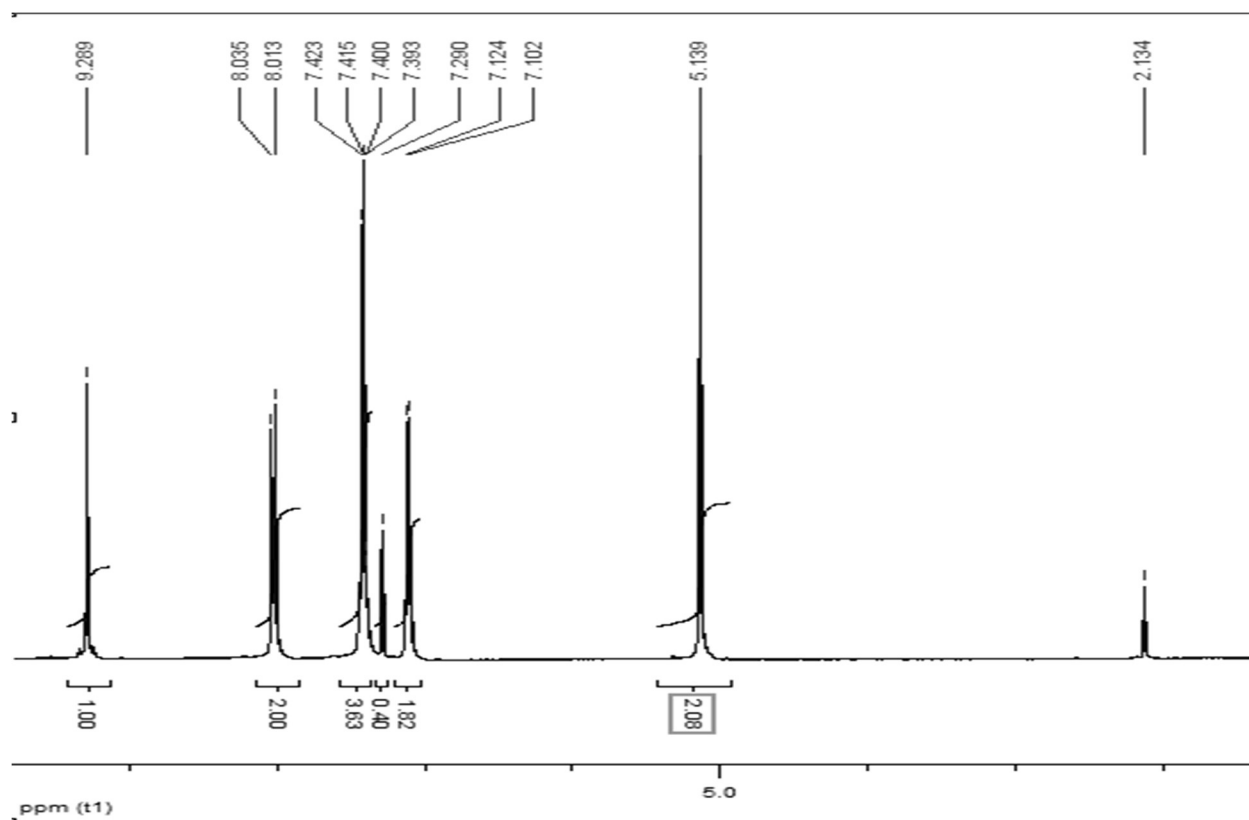

**Supplementary figure 7:** <sup>1</sup>H-NMR-spectrum Of compound **6a** in CDCl<sub>3</sub>

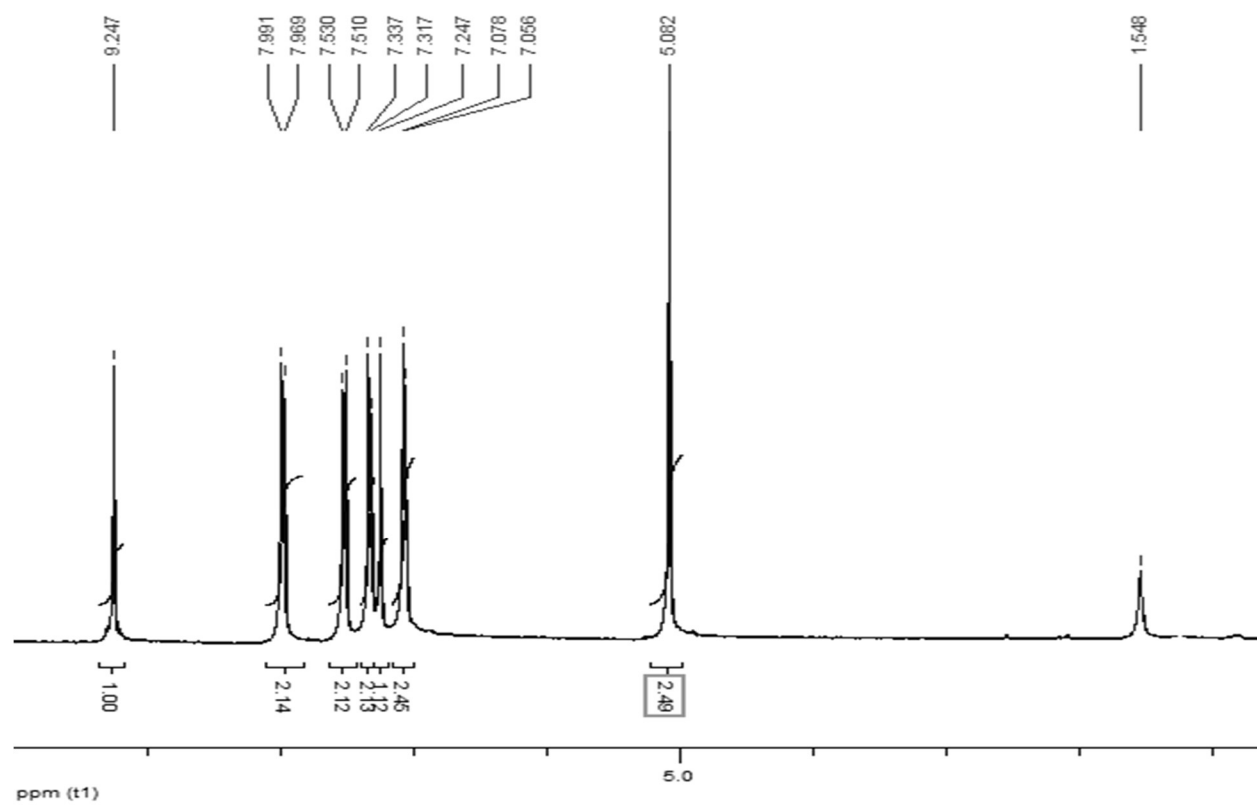

**Supplementary figure 8:** <sup>1</sup>H-NMR-spectrum Of compound **6b** in CDCl<sub>3</sub>



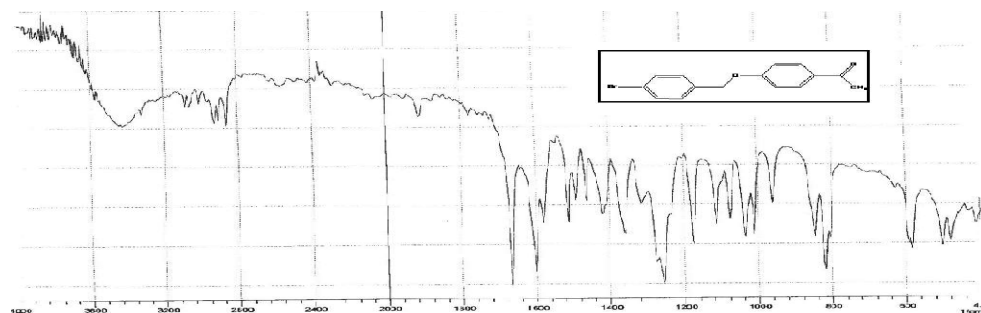

Figure 9: IR-spectrum Of compound **3b** in KBr disc

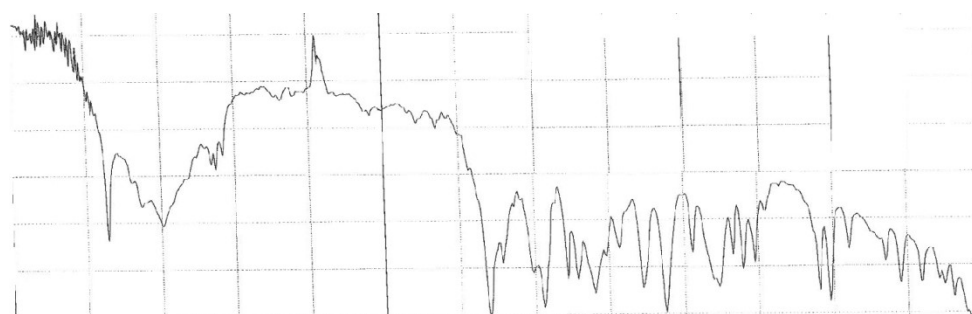

Supplementary figure 10: IR-spectrum Of compound **4b** in KBr disc

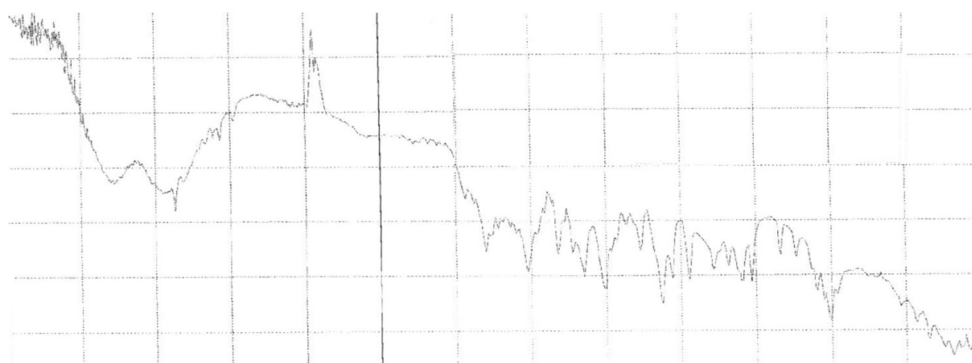

Supplementary figure 11: IR-spectrum Of compound **5b** in KBr disc

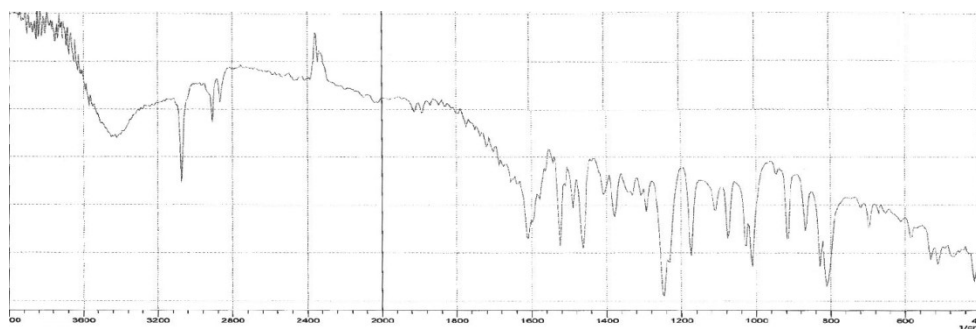

Supplementary figure 12: IR-spectrum Of compound **6b** in KBr disc

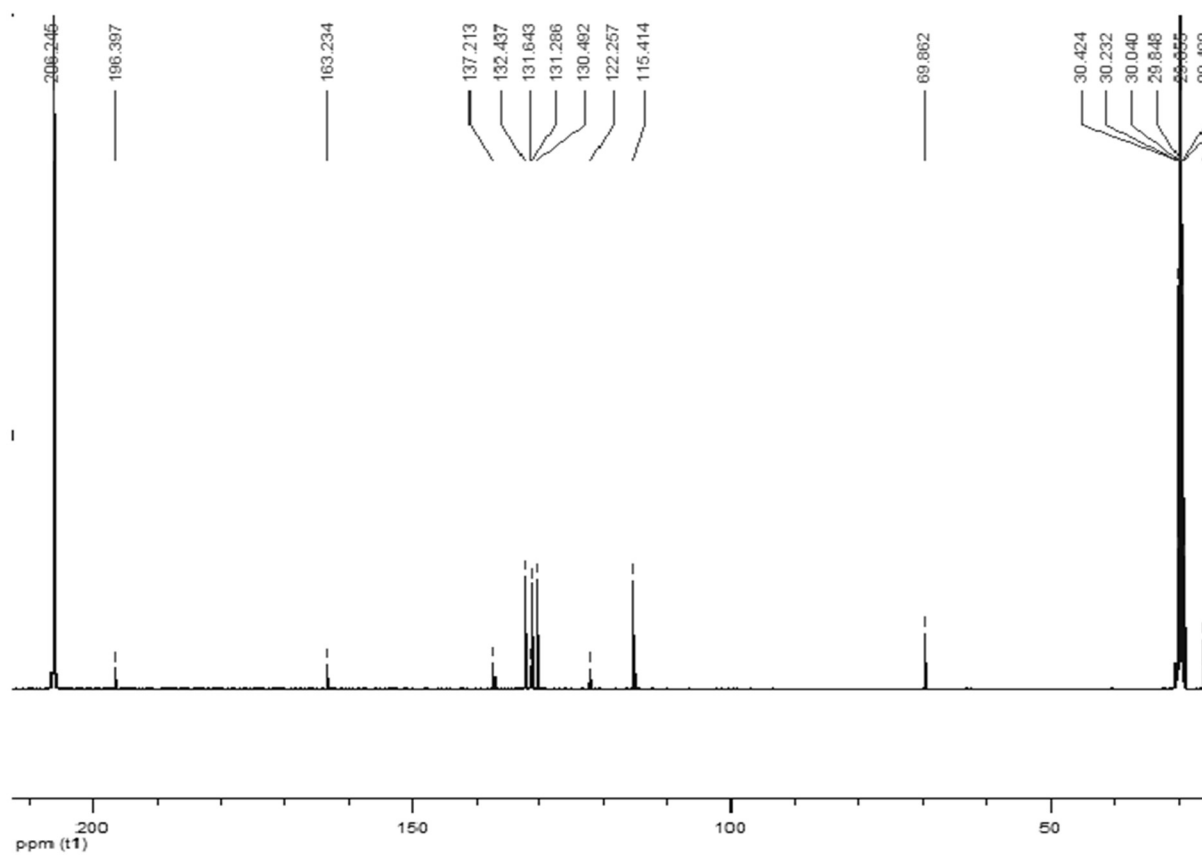

Supplementary figure 13:  $^{13}\text{C}$ -NMR-spectrum Of compound **3b** in acetone- $\text{d}_6$

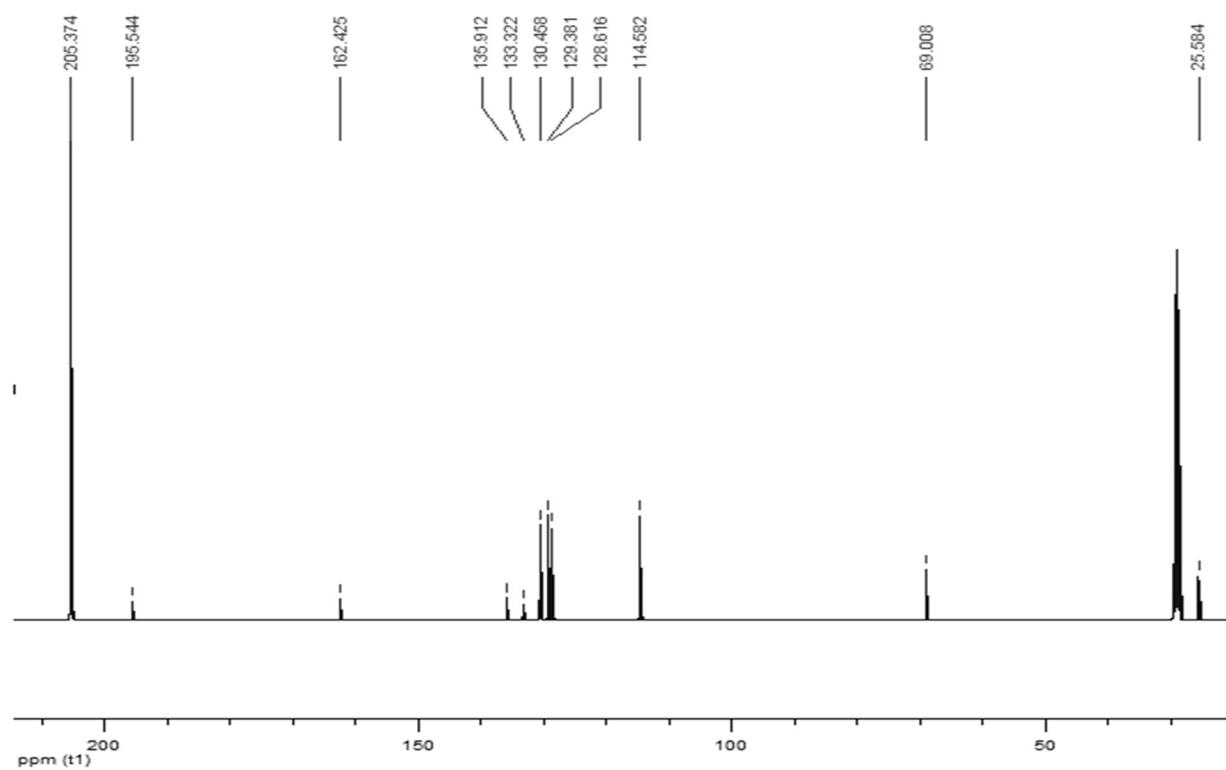

**Supplementary figure 14:** <sup>13</sup>C-NMR-spectrum Of compound **3a** in acetone-d<sub>6</sub>

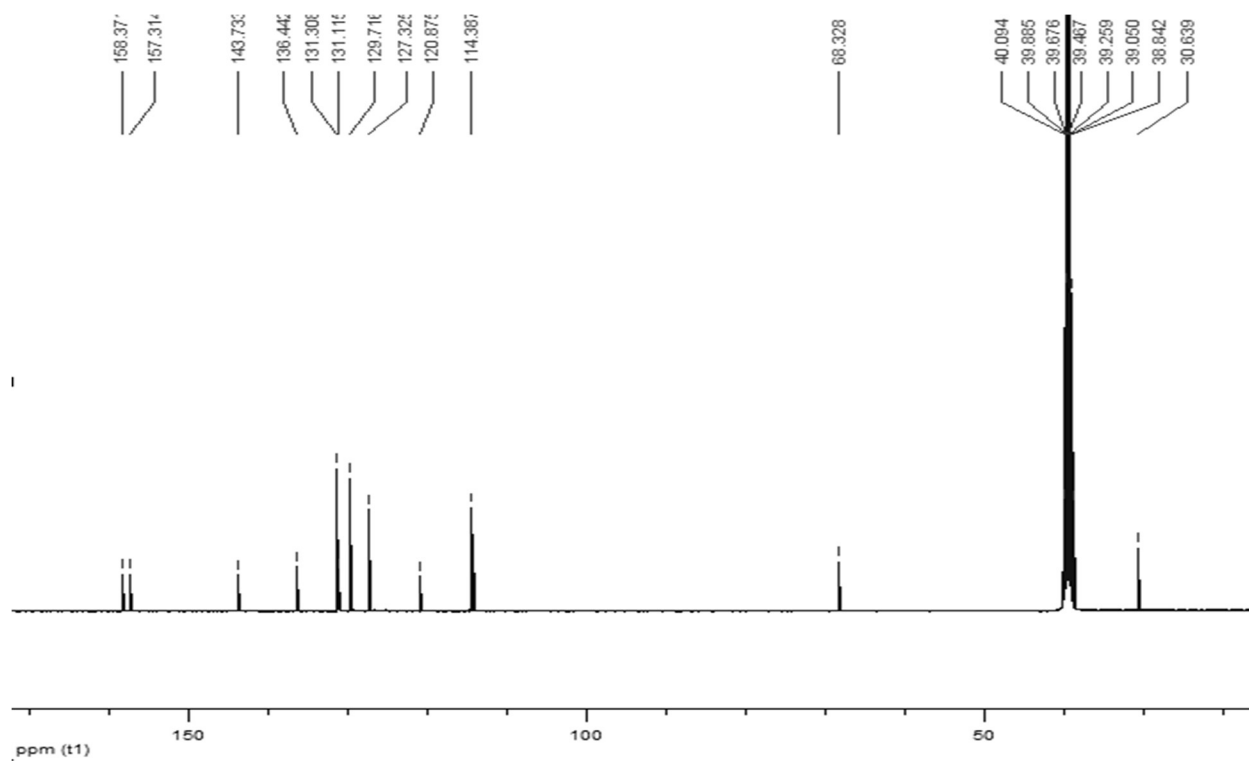

**Supplementary figure 15:** <sup>13</sup>C-NMR-spectrum of compound **4b** in DMSO-d<sub>6</sub>

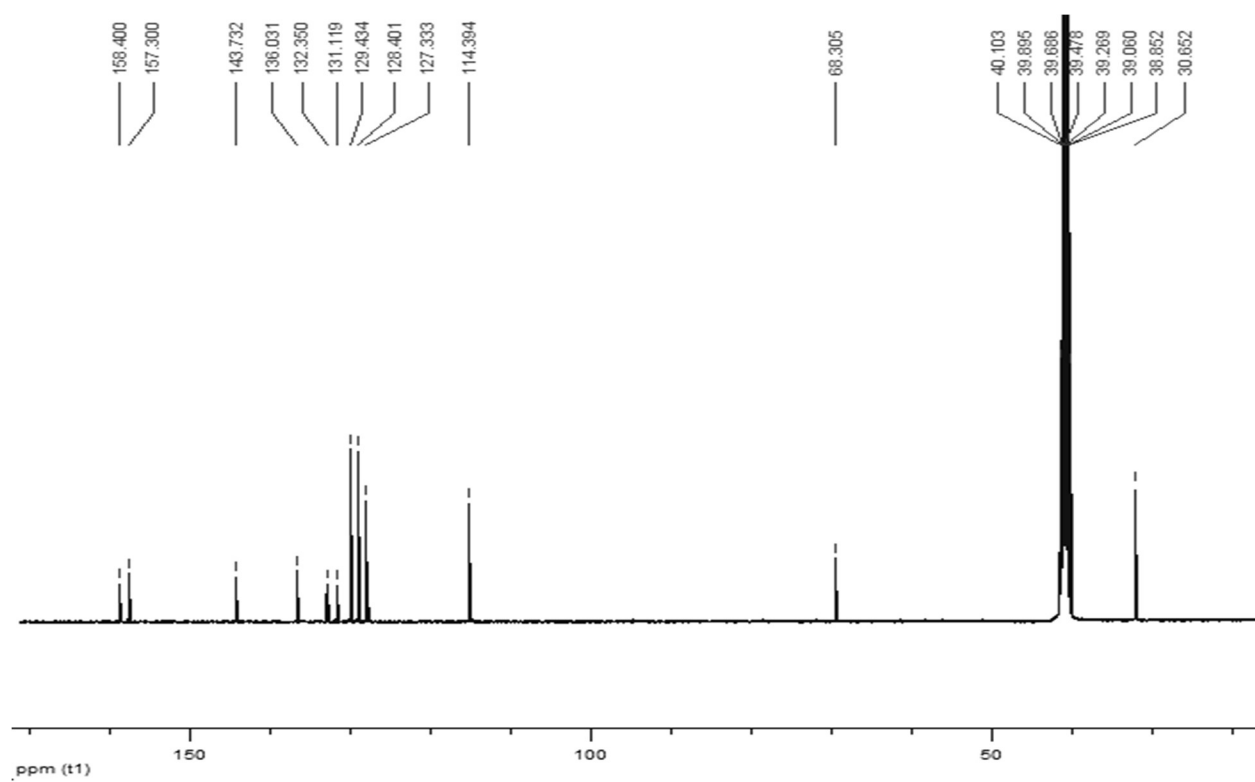

**Supplementary figure 16:** <sup>13</sup>C-NMR-spectrum of compound **4a** in DMSO-d<sub>6</sub>

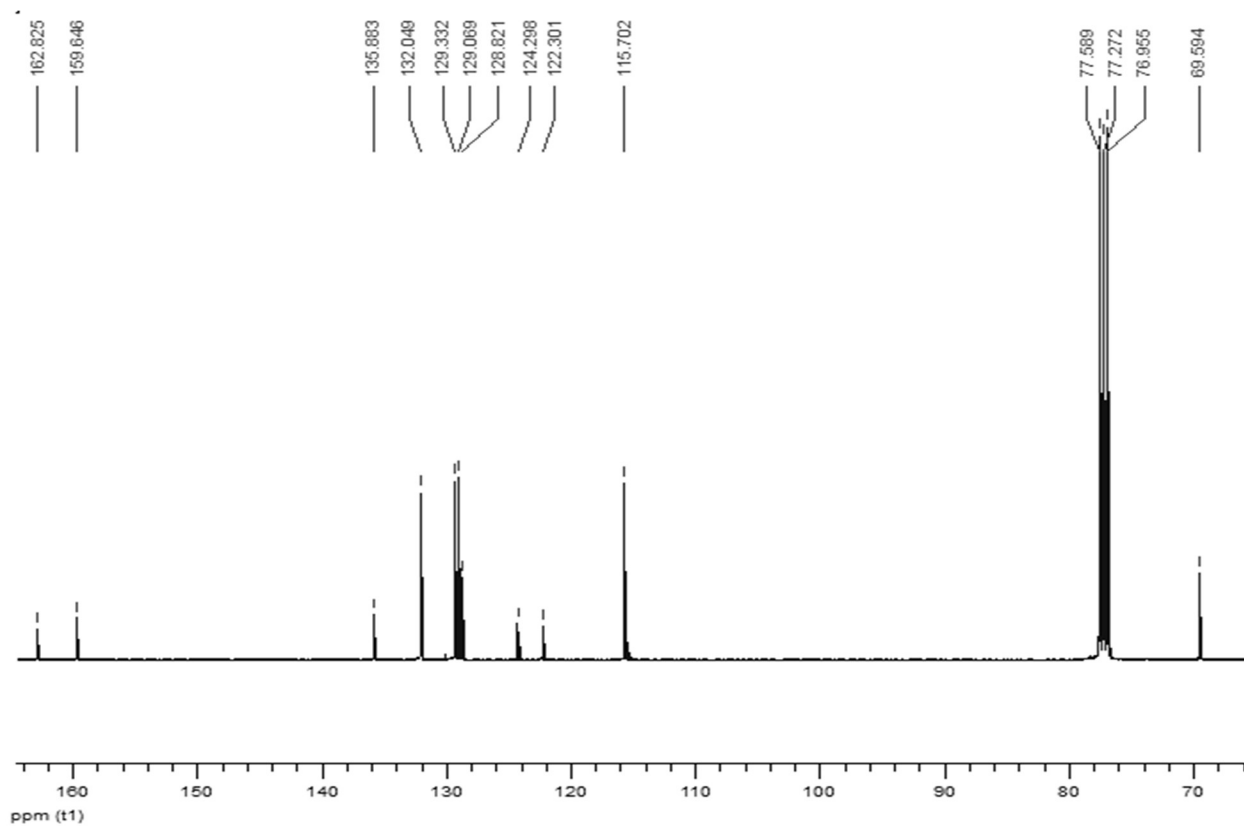

**Supplementary figure 17:** <sup>13</sup>C-NMR-spectrum Of compound **5b** in CDCl<sub>3</sub>

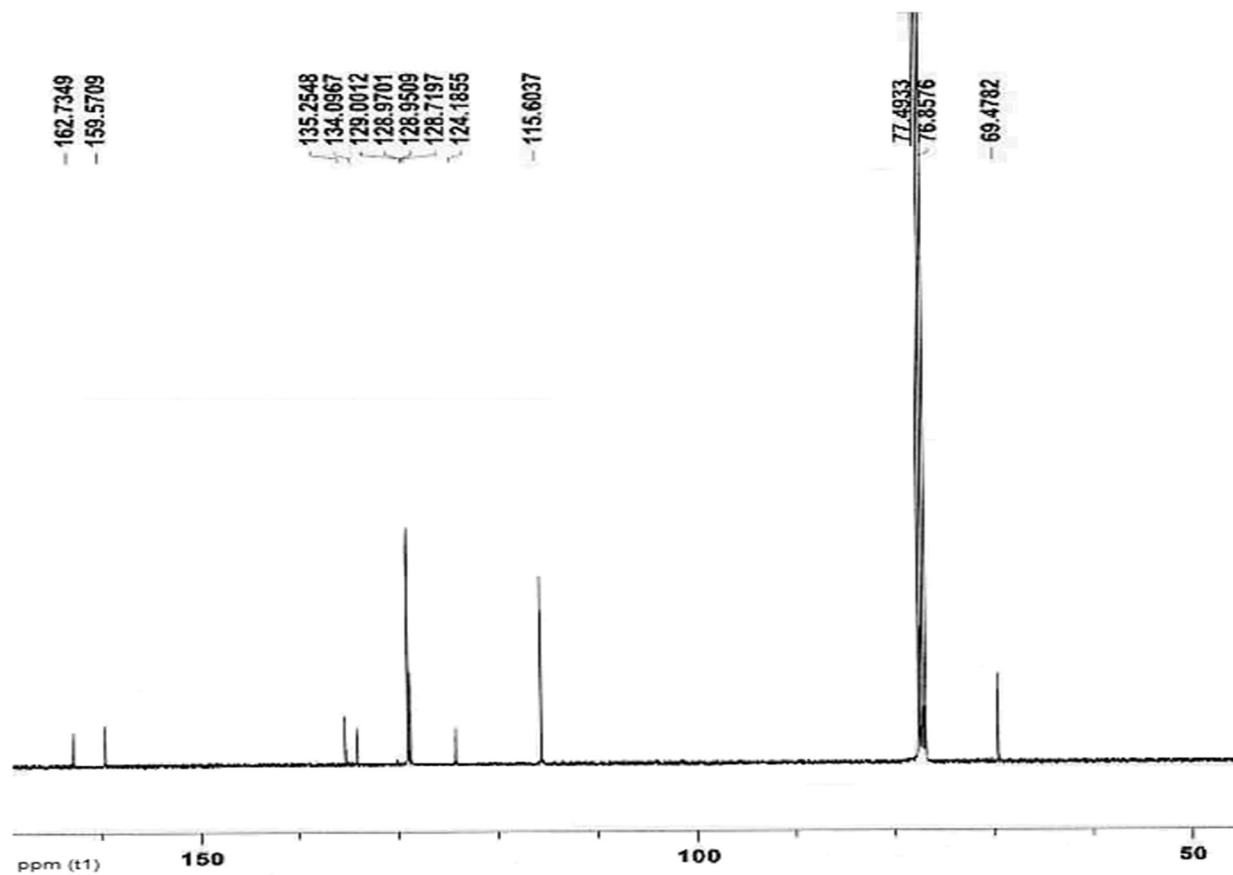

**Supplementary figure 18:** <sup>13</sup>C-NMR-spectrum Of compound **5a** in CDCl<sub>3</sub>

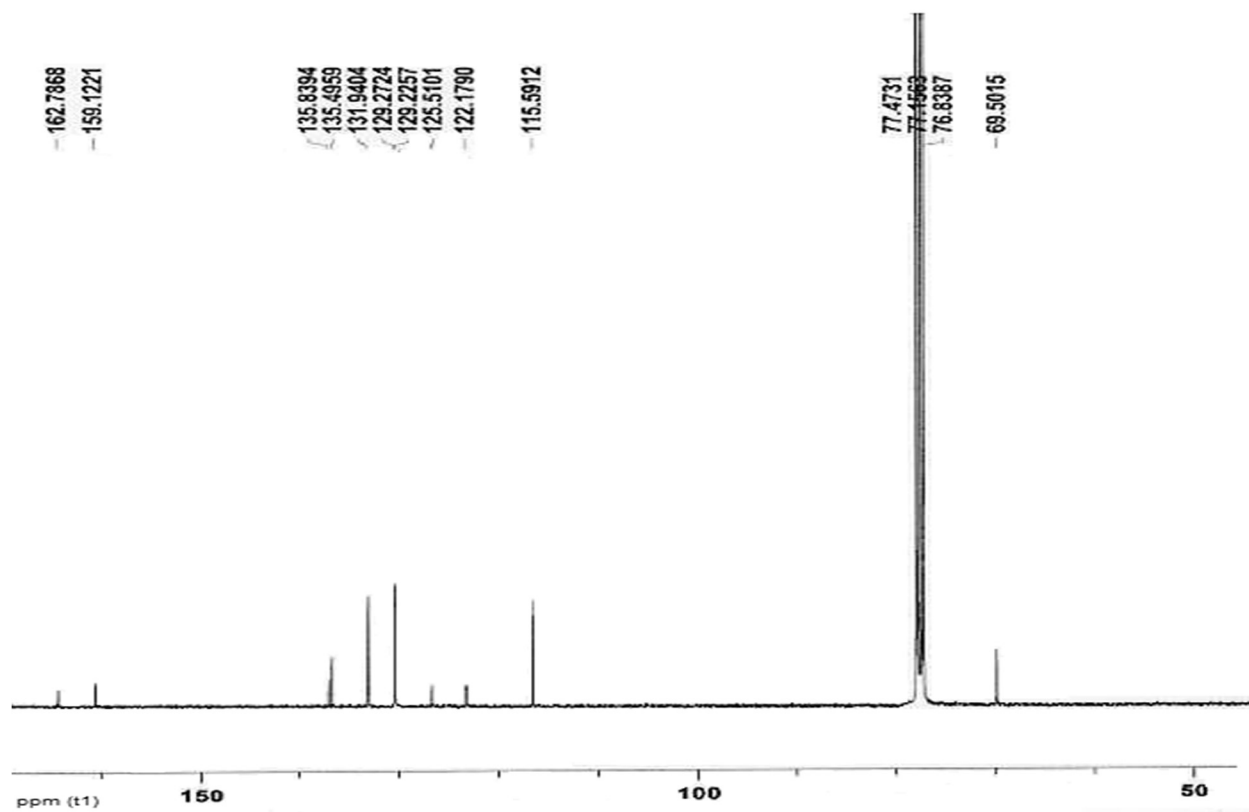

**Supplementary figure 19:** <sup>13</sup>C-NMR-spectrum Of compound **6b** in CDCl<sub>3</sub>



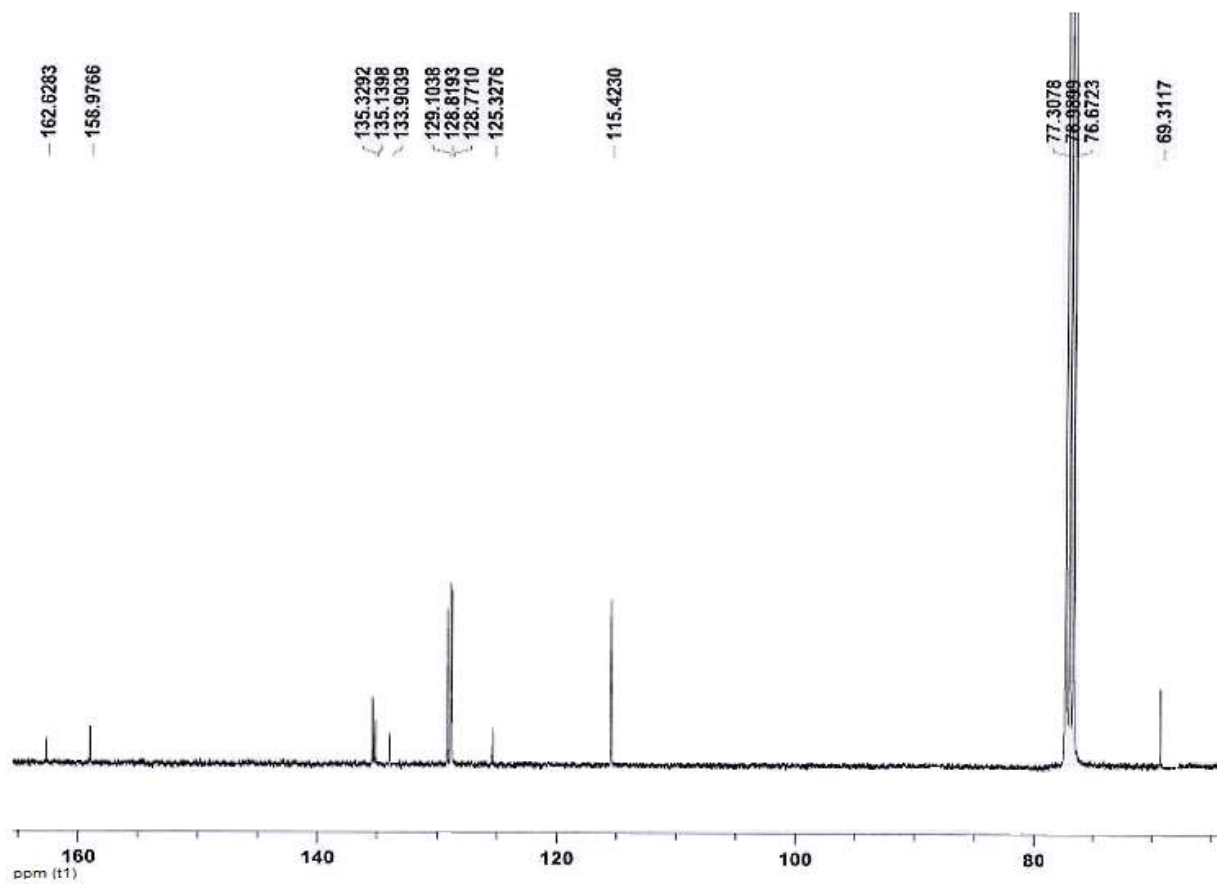

Supplementary figure 20:  $^{13}\text{C}$ -NMR-spectrum Of compound **6a** in  $\text{CDCl}_3$
